# Supplementary material for: Diet Pattern Analysis in Alzheimer’s Disease Implicates Gender Differences in Folate–B12–Homocysteine Axis on Cognitive Outcomes
Source: MDPI journal article supplement (doi:10.3390/nu16050733), 2024-03-04
Supplement: s1 [file s1]

## **Supplementary File**

**Title:** Diet pattern analysis in Alzheimer disease implicates gender differences in folate-B12-homocysteine axis on cognitive outcomes

**Supplementary Table S1.** Blood profiles of the patients with Alzheimer disease

|                                    | Total  |        | Male   |        | Female |        | MW test         |
|------------------------------------|--------|--------|--------|--------|--------|--------|-----------------|
|                                    | Mean   | SD     | Mean   | SD     | Mean   | SD     | p-value         |
| Homocysteine ( $\mu\text{mol/L}$ ) | 12.31  | 4.74   | 13.72  | 5.21   | 11.34  | 4.14   | <b>&lt;.001</b> |
| HS-CRP (mg/L)                      | 3.24   | 8.13   | 3.27   | 7.59   | 3.22   | 8.49   | 0.559           |
| Hemoglobin-A1C(%)                  | 6.12   | 0.90   | 6.12   | 0.88   | 6.13   | 0.92   | 0.845           |
| Fasting blood sugar(mg/dL)         | 128.77 | 26.52  | 128.94 | 25.28  | 128.64 | 27.40  | 0.943           |
| Creatinine (mg/dL)                 | 1.01   | 0.82   | 1.12   | 0.55   | 0.94   | 0.96   | <b>&lt;.001</b> |
| GOT (U/L)                          | 24.54  | 9.46   | 24.42  | 10.36  | 24.63  | 8.82   | 0.459           |
| GPT(U/L)                           | 21.23  | 12.39  | 22.70  | 13.32  | 20.22  | 11.62  | <b>0.044</b>    |
| HDL-C(mg/dL)                       | 51.57  | 15.16  | 46.34  | 12.75  | 55.23  | 15.65  | <b>&lt;.001</b> |
| VLDL-C(mg/dL)                      | 22.50  | 10.87  | 23.40  | 12.09  | 21.87  | 9.92   | 0.428           |
| LDL-C(mg/dL)                       | 107.12 | 34.55  | 103.27 | 30.80  | 109.81 | 36.76  | 0.085           |
| T-Cholesterol(mg/dL)               | 182.17 | 39.09  | 173.37 | 33.55  | 188.35 | 41.50  | <b>&lt;.001</b> |
| Triglyceride(mg/dL)                | 117.20 | 72.83  | 119.40 | 67.66  | 115.67 | 76.32  | 0.541           |
| B12 (pg/mL)                        | 875.57 | 653.57 | 779.54 | 551.16 | 941.97 | 709.24 | <b>0.007</b>    |
| Folate(pg/mL)                      | 13.70  | 8.90   | 11.87  | 8.09   | 14.96  | 9.22   | <b>&lt;.001</b> |
| Albumin (g/dL)                     | 4.41   | 0.30   | 4.46   | 0.28   | 4.38   | 0.31   | <b>0.009</b>    |
| Hemoglobin(g/dL)                   | 13.25  | 1.63   | 14.20  | 1.48   | 12.58  | 1.38   | <b>&lt;.001</b> |

MW test: Mann-Whitney U test

SD: standard deviation; Comparisons between male and female gender by Mann-Whitney U test

HS-CRP: high sensitive C reactive protein; HDL-C: high density lipoprotein C; VLDL-C: very low density lipoprotein C; LDL-C: Low density lipoprotein C; GOT: Glutamic Oxaloacetic Transaminase; GPT: Glutamic Pyruvic Transaminase

**Supplementary Table S2.** The regression analysis for MMSE score in patients with Alzheimer disease

|                                                                                 | Coefficient | Std. error | t value | P value  | 95% C.I.    |             | VIF   |
|---------------------------------------------------------------------------------|-------------|------------|---------|----------|-------------|-------------|-------|
|                                                                                 |             |            |         |          | Lower limit | Upper limit |       |
| Model for Male: adjusted R square=0.220; Durbin Watson's test statistic=1.643   |             |            |         |          |             |             |       |
| Constant                                                                        | 14.583      | 6.339      | 2.301   | 0.023    |             |             |       |
| Age                                                                             | -0.125      | 0.057      | -2.168  | 0.032*   | -0.238      | -0.011      | 1.241 |
| Education                                                                       | 0.297       | 0.12       | 2.477   | 0.014*   | 0.06        | 0.533       | 1.234 |
| Body mass index                                                                 | 0.355       | 0.133      | 2.672   | 0.008**  | 0.093       | 0.617       | 1.061 |
| B12                                                                             | 0.003       | 0.001      | 3.233   | 0.001**  | 0.001       | 0.004       | 1.006 |
| Coffee/ Tea                                                                     | 0.596       | 0.223      | 2.666   | 0.008**  | 0.155       | 1.036       | 1.069 |
| Model for Female: adjusted R square=0.224; Durbin Watson's test statistic=2.055 |             |            |         |          |             |             |       |
| Constant                                                                        | 14.175      | 5.480      | 2.587   | .010     |             |             |       |
| Age                                                                             | -.090       | .060       | -1.497  | .136     | -.208       | .028        | 1.205 |
| Education                                                                       | .528        | .107       | 4.919   | <.001*** | .316        | .739        | 1.205 |
| Body mass index                                                                 | .355        | .130       | 2.723   | .007**   | .098        | .612        | 1.128 |
| Homocysteine                                                                    | -.283       | .108       | -2.613  | .009**   | -.496       | -.070       | 1.049 |
| Coffee/ Tea                                                                     | .789        | .223       | 3.537   | <.001*** | .350        | 1.228       | 1.132 |

- \*p<0.05, \*\*p<0.01, \*\*\*P<0.001
- Dependent variables: mini-mental state examination (MMSE)
- Std. error: standard error
- C.I: confidence intervals
- VIF: variance inflation factor

**Figure Legend:**  
**Supplementary Figure S1:**

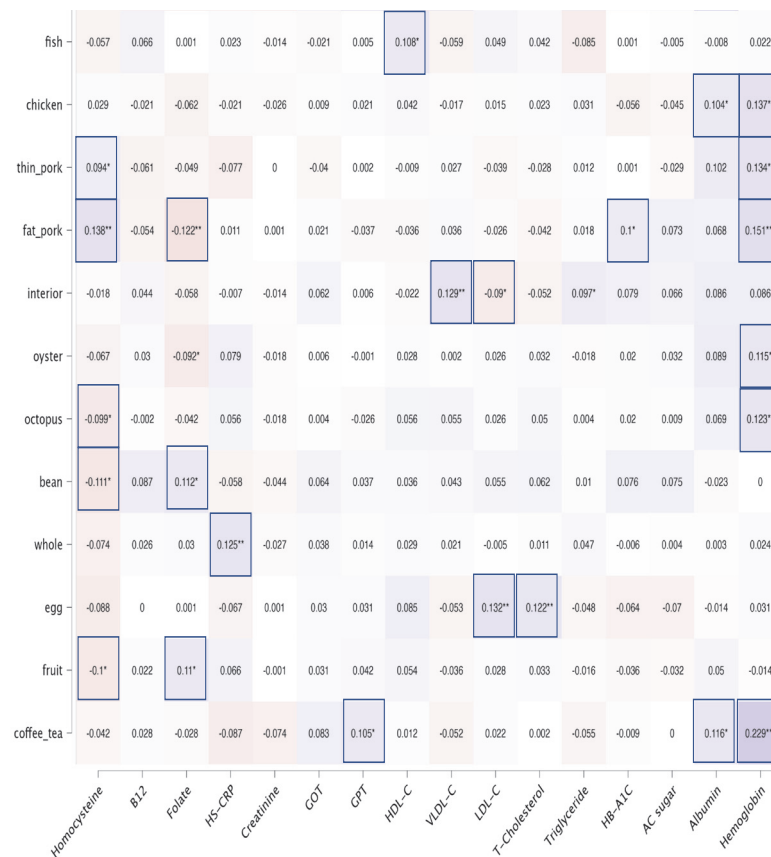

**Figure Legend:**  
Correlation analysis heat map between blood profiles and diet pattern. Numbers indicate correlation coefficient. \*  $p < 0.05$ , \*\*  $p < 0.01$ , \*\*\*  $p < 0.001$

## Supplementary Figure S2:

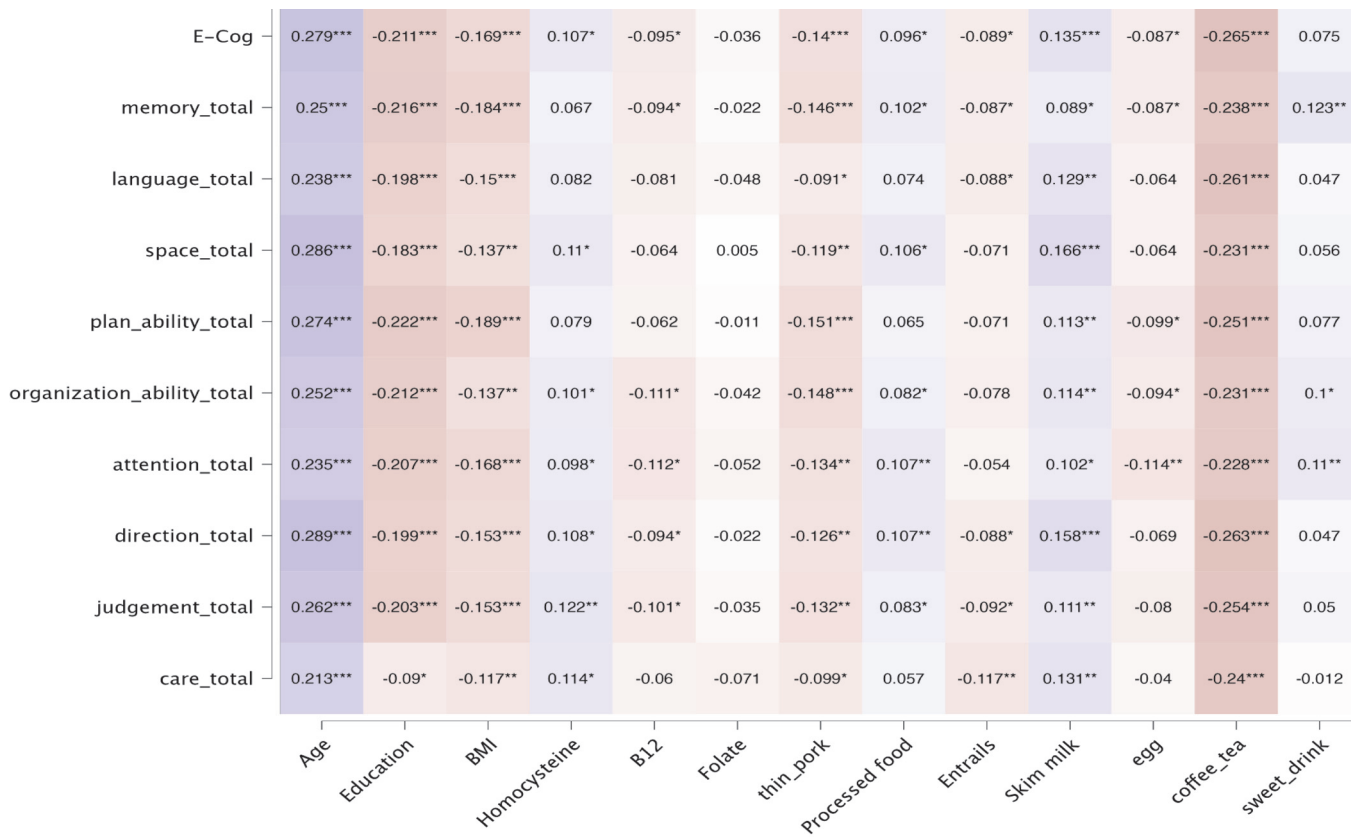

### Figure Legend:

Correlation heat map between Y axis: Everyday cognition scale (and its subdomains) and X axis: demographic data, homocysteine-B12-folate axis, and diet pattern. The numbers indicated correlation coefficients. E-cog: Everyday cognition \*p<0.05, \*\*p<0.01, \*\*\*p<0.001

### Supplementary Figure S3:

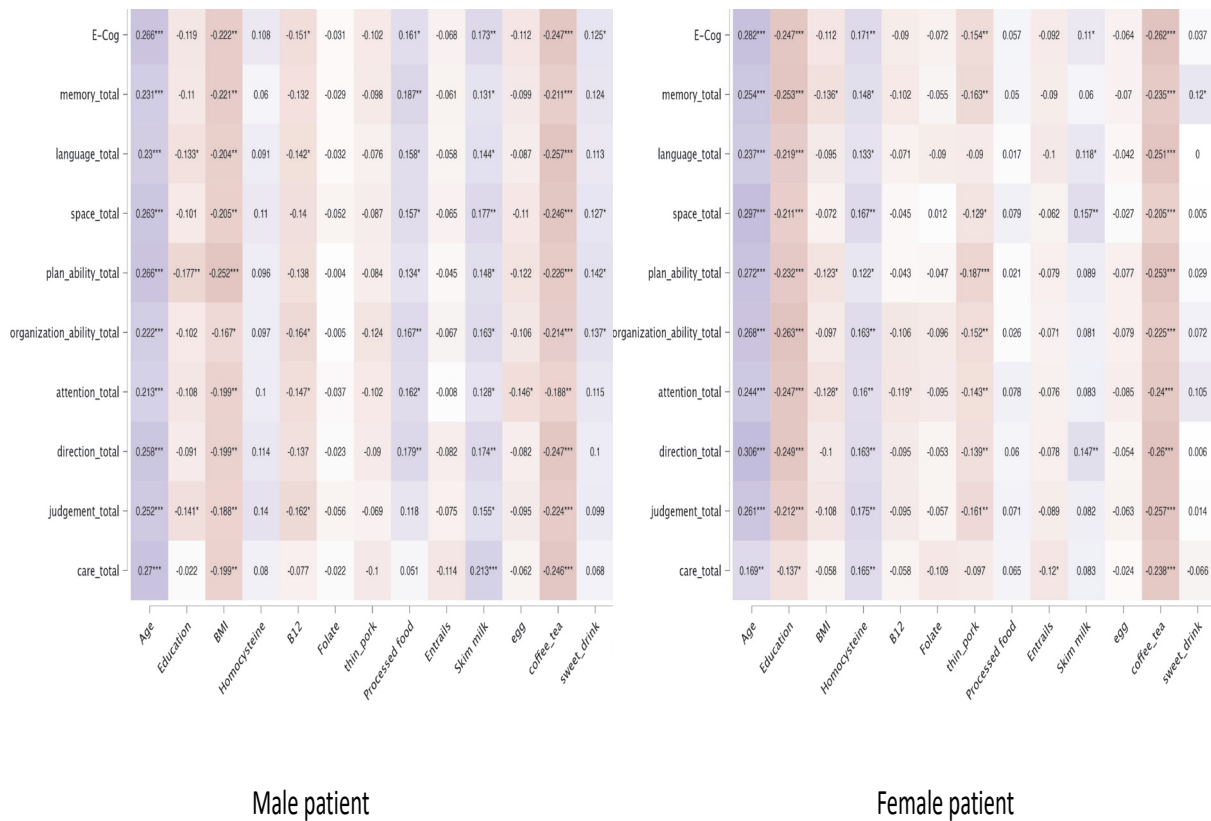

Figure Legend: Gender effect of homocysteine and B12 on Every-day Cognition (E-Cog). Correlation heat map between Y axis: Everyday cognition scale (and its subdomains) and X axis: demographic data, homocysteine-B12-folate axis, and diet pattern. The numbers indicated correlation coefficients.

\*: p-value < 0.05; \*\*: p-value < 0.01; \*\*\*: p-value < 0.001.
